# Supplementary material for: Overview of Ni-Based Catalysts for Hydrogen Production from Biogas Reforming
Source: MDPI journal article supplement (doi:10.3390/catal13091296), 2023-09-14
Supplement: s1 [file s1]

## **Overview of Ni-based catalysts for hydrogen production from biogas reforming**

Robinson L. Manfro and Mariana M.V.M. Souza\*

Escola de Química – Universidade Federal do Rio de Janeiro (UFRJ), Centro de Tecnologia, Bloco E, sala 206, CEP 21941-909, Rio de Janeiro/RJ, Brazil.

\*Corresponding author (E-mail: mmattos@eq.ufrj.br)

**Table S1.** Influence of promoter on the activity of Ni/Al<sub>2</sub>O<sub>3</sub> catalysts for biogas DR.

| Promoter<br>(loading, wt%)                               | Ni loading<br>(wt%) | Preparation method | Reaction conditions                       |                     |          | Conversion (%)  |                 | Ref. |
|----------------------------------------------------------|---------------------|--------------------|-------------------------------------------|---------------------|----------|-----------------|-----------------|------|
|                                                          |                     |                    | CH <sub>4</sub> /CO <sub>2</sub><br>ratio | Temperature<br>(°C) | Time (h) | CH <sub>4</sub> | CO <sub>2</sub> |      |
| -                                                        | 15                  | Sol-gel            | 1                                         | 800                 | 37       | 43.5            | 50.4            | [41] |
| MgO (37.5)                                               |                     |                    |                                           |                     |          | 87.0            | 90.6            |      |
| -                                                        | 11 (a)              | Co-precipitation   | 1                                         | 750                 | 60       | 40              | 45              | [43] |
| MgO (10 <sup>a</sup> )                                   |                     |                    |                                           |                     |          | 88              | 92              |      |
| -                                                        | 5                   | Impregnation       | 1                                         | 700                 | 5        | 78              | n.r.            | [47] |
| MgO (3)                                                  |                     |                    |                                           |                     |          | 78              | n.r.            |      |
| -                                                        | 10                  | Impregnation       | 1                                         | 550                 | 8.3      | 39              | 46              | [51] |
| CeO <sub>2</sub> (6)                                     |                     |                    |                                           |                     |          | 57              | 69              |      |
| CeO <sub>2</sub> (20)                                    | 10                  | Co-precipitation   | 1                                         | 800                 | 5        | 75              | 85              | [55] |
|                                                          |                     | Impregnation       |                                           |                     |          | 52              | 65              |      |
| -                                                        | 8                   | Impregnation       | 1.5                                       | 750                 | 20       | 2               | 8               | [59] |
| CeO <sub>2</sub> (10)                                    |                     |                    |                                           |                     |          | 30              | 50              |      |
| CeO <sub>2</sub> (10)-La <sub>2</sub> O <sub>3</sub> (4) |                     |                    |                                           |                     |          | 50              | 78              |      |
| -                                                        | 10                  | Sol-gel            | 1                                         | 800                 | 8        | 65              | 75              |      |
| CeO <sub>2</sub> (10)                                    |                     |                    |                                           |                     |          | 85              | 90              | [60] |
| La <sub>2</sub> O <sub>3</sub> (10)                      |                     |                    |                                           |                     |          | 70              | 80              |      |
| -                                                        | 25                  | Co-precipitation   | 1                                         | 700                 | 5        | 68              | 78              |      |
| CeO <sub>2</sub> (5)                                     |                     |                    |                                           |                     |          | 60              | 77              |      |
| ZrO <sub>2</sub> (5)                                     |                     |                    |                                           |                     |          | 52              | 75              | [66] |
| -                                                        | 8                   | Impregnation       | 1.57                                      | 800                 | 10       | 50              | 80              |      |
| La <sub>2</sub> O <sub>3</sub> (4)                       |                     |                    |                                           |                     |          | 65              | 92              |      |
| -                                                        | 15                  | Impregnation       | 1                                         | 700                 | 36       | 85              | n.r.            |      |
| ZrO <sub>2</sub> (5)                                     |                     |                    |                                           |                     |          | 90              | n.r.            | [72] |

n.r.: not reported; (a) mol%

**Table S2.** Influence of support on the activity of Ni catalysts for biogas DR.

| Support                                            | Ni loading (wt%) | Preparation method | Reaction conditions                    |                  |          | Conversion (%)  |                 | Ref. |
|----------------------------------------------------|------------------|--------------------|----------------------------------------|------------------|----------|-----------------|-----------------|------|
|                                                    |                  |                    | CH <sub>4</sub> /CO <sub>2</sub> ratio | Temperature (°C) | Time (h) | CH <sub>4</sub> | CO <sub>2</sub> |      |
| Al <sub>2</sub> O <sub>3</sub>                     | 8                | Impregnation       | 1                                      | 750              | 30       | 52              | 60              | [39] |
| MgO-Al <sub>2</sub> O <sub>3</sub>                 |                  |                    |                                        |                  | 100      | 88              | 90              |      |
| MgO                                                |                  |                    |                                        |                  | 100      | 75              | 80              |      |
| Al <sub>2</sub> O <sub>3</sub>                     | 10               | Impregnation       | 1                                      | 750              | 2 (a)    | 80              | n.r             | [40] |
| MgO                                                |                  |                    |                                        |                  | 12       | 64              |                 |      |
| CeO <sub>2</sub>                                   |                  |                    |                                        |                  |          | 50              |                 |      |
| CeO <sub>2</sub>                                   | 5                | Impregnation       | 1                                      | 500              | 10       | 30              | 44              | [52] |
| Al <sub>2</sub> O <sub>3</sub>                     | 10               | EISA (b)           | 1                                      | 800              | 72       | 50              | 65              | [57] |
| CeO <sub>2</sub> -Al <sub>2</sub> O <sub>3</sub>   |                  |                    |                                        |                  |          | 70              | 80              |      |
| CeO <sub>2</sub>                                   | 5                | Impregnation       | 1                                      | 700              | 5        | 68              | 70              | [75] |
| Ce <sub>0.6</sub> Zr <sub>0.4</sub> O <sub>2</sub> |                  |                    |                                        |                  |          | 62              | n.r.            |      |
| ZrO <sub>2</sub>                                   | 5                | Impregnation       | 1                                      | 600              | 24       | 48              | 62              | [77] |
| CeO <sub>2</sub>                                   |                  |                    |                                        |                  |          | 15              | 21              |      |
| Ce <sub>0.6</sub> Zr <sub>0.4</sub> O <sub>2</sub> |                  |                    |                                        |                  |          | 28              | 50              |      |
| ZrO <sub>2</sub> (amorphous)                       | 5                | Impregnation       | 1                                      | 750              | 50       | 92              | 98              | [79] |
| ZrO <sub>2</sub> (monoclinic)                      |                  |                    |                                        |                  |          | 35 (c)          | 42 (c)          |      |
| ZrO <sub>2</sub>                                   | 8                | Impregnation       | 1.5                                    | 750              | 28       | 22              | 45              | [83] |
| La <sub>2</sub> O <sub>3</sub> -ZrO <sub>2</sub>   |                  |                    |                                        |                  |          | 40              | 58              |      |
| CeO <sub>2</sub> -ZrO <sub>2</sub>                 |                  |                    |                                        |                  |          | 42              | 62              |      |
| Al <sub>2</sub> O <sub>3</sub>                     | 5                | Impregnation       | 1                                      | 700              | 9        | 77              | 75              | [85] |
| HY                                                 |                  |                    |                                        |                  |          | 61              | 63              |      |
| HZSM-5                                             |                  |                    |                                        |                  |          | 75              | 79              |      |
| SiO <sub>2</sub>                                   | 10               | Impregnation       | 1                                      | 800              | 9        | 40              | 55              | [94] |
| MCM-41                                             |                  |                    |                                        |                  |          | 65              | 75              |      |

n.r.: not reported; (a) the reactor was blocked; (b) EISA: evaporation-induced self-assembly; (c) severe deactivation

**Table S3.** Influence of transition metals on the activity of Ni bimetallic catalysts for biogas DR.

| Metal<br>(loading, wt%) | Support                        | Ni loading<br>(wt%) | Preparation method                       | Reaction conditions                       |                     |          | Conversion (%)  |                 | Ref.  |
|-------------------------|--------------------------------|---------------------|------------------------------------------|-------------------------------------------|---------------------|----------|-----------------|-----------------|-------|
|                         |                                |                     |                                          | CH <sub>4</sub> /CO <sub>2</sub><br>ratio | Temperature<br>(°C) | Time (h) | CH <sub>4</sub> | CO <sub>2</sub> |       |
| -<br>Co (0.89)          | H-ZrO <sub>2</sub>             | 4.82<br>3.83        | Co-impregnation                          | 1                                         | 700                 | 80       | 51<br>69.1      | 60<br>75.7      | [113] |
| -<br>Co (2.5)           | Al <sub>2</sub> O <sub>3</sub> | 10<br>7.5           | Co-impregnation                          | 1                                         | 600                 | 24       | 23<br>30        | n.r.            | [116] |
| -<br>Co (2.5)           | Al <sub>2</sub> O <sub>3</sub> | 5                   | Co-impregnation with<br>templating agent | 1                                         | 700                 | 97       | 69<br>73.1      | 76<br>81.6      | [117] |
| -<br>Cu (2.81)          | Mg(Al)O                        | 12<br>8.96          | Co-precipitation                         | 1                                         | 600                 | 25       | 43<br>51        | 56<br>58        | [128] |
| -<br>Cu (0.83)          | Al <sub>2</sub> O <sub>3</sub> | 7.5<br>10           | Co-impregnation                          | 1                                         | 750                 | 7        | 82<br>92        | 85<br>94        | [129] |
| -<br>Cu (1.0)           | Al <sub>2</sub> O <sub>3</sub> | 10                  | Co-impregnation                          | 1                                         | 750                 | 16       | 64<br>92        | n.r.            | [130] |
| -<br>Cu (0.5)           | SiO <sub>2</sub>               | 4                   | Electrostatic<br>adsorption              | 1                                         | 750                 | 16<br>50 | 22<br>78        | 51<br>85        | [131] |
| Fe (2.49)               | Al <sub>2</sub> O <sub>3</sub> | 7.25                | EISA (a)                                 | 1                                         | 600                 | 50       | 19              | 30              | [135] |
| Fe (5.03)               |                                | 4.98                |                                          |                                           |                     |          | 28              | 40              |       |
| -<br>Fe (4.2)           | Al <sub>2</sub> O <sub>3</sub> | 15.7<br>9.6         | Modified EISA (a)                        | 1                                         | 450                 | 20       | 8<br>10         | 10<br>14        | [136] |

n.r.: not reported; (a) EISA: evaporation-induced self-assembly

**Table S4.** Influence of noble metals on the activity of Ni bimetallic catalysts for biogas DR.

| Metal<br>(loading, wt%)   | Support                                          | Ni loading<br>(wt%) | Preparation method          | Reaction conditions                       |                     |            | Conversion (%)       |                      | Ref.  |
|---------------------------|--------------------------------------------------|---------------------|-----------------------------|-------------------------------------------|---------------------|------------|----------------------|----------------------|-------|
|                           |                                                  |                     |                             | CH <sub>4</sub> /CO <sub>2</sub><br>ratio | Temperature<br>(°C) | Time (h)   | CH <sub>4</sub>      | CO <sub>2</sub>      |       |
| -<br>Pt (0.4)             | Al <sub>2</sub> O <sub>3</sub>                   | 10                  | Reverse<br>microemulsion    | 1                                         | 700                 | 14         | n.r.                 | 58<br>71             | [139] |
| -<br>Pt (0.5)             | ZSM-5                                            | 5.0<br>5.5          | Sequential<br>impregnation  | 1                                         | 600                 | 2          | 20.7<br>28.4         | 58.1<br>65           | [141] |
| -<br>Pt (0.54)            | silicalite-1<br>zeolite                          | 1.96<br>1.58        | Impregnation                | 1                                         | 800                 | 6          | 65<br>70             | 74<br>80             | [142] |
| -<br>Pt (0.4)             | Al <sub>2</sub> O <sub>3</sub>                   | 10                  | Impregnation                | 1                                         | 700                 | 14         | n.r.                 | 50<br>69             | [144] |
| -<br>Rh (1.75)            | Al <sub>2</sub> O <sub>3</sub>                   | 10                  | Impregnation                | 1                                         | 800                 | 4          | 62<br>70             | 68.4<br>76           | [27]  |
| -<br>Rh (0.6)             | MgAl <sub>2</sub> O <sub>4</sub>                 | 2.2<br>1.6          | One-pot sol-gel             | 1                                         | 600                 | 20         | 36<br>42             | 45<br>52             | [147] |
| -<br>Rh (3.75)            | SiO <sub>2</sub>                                 | 5<br>1.25           | Impregnation                | 1                                         | 700                 | 24         | 72<br>83             | 77<br>84             | [148] |
| -<br>Rh (1.0)<br>Pd (0.5) | CeO <sub>2</sub> -Al <sub>2</sub> O <sub>3</sub> | 15<br>14<br>14.5    | Impregnation                | 1                                         | 700                 | 48         | 57.7<br>68.3<br>51.9 | 72.4<br>81.4<br>66.9 | [149] |
| -<br>Pd (1.3)             | ZrO <sub>2</sub> -La <sub>2</sub> O <sub>3</sub> | 5<br>5.4            | Impregnation                | 1                                         | 700                 | 2          | 49<br>73             | 62<br>78             | [150] |
| -<br>Pd (0.5)             | Al <sub>2</sub> O <sub>3</sub>                   | 6                   | Co-impregnation             | 1                                         | 750                 | 100        | 75<br>85             | 82<br>92             | [151] |
| -<br>Pd (0.2)             | MgO                                              | 5                   | Deposited by<br>sublimation | 1                                         | 750                 | 100<br>200 | 94.4<br>96.5         | 96.1<br>95.5         | [152] |
| -<br>Ru (0.6)             | Al <sub>2</sub> O <sub>3</sub>                   | 11.6<br>13.1        | Impregnation                | 1                                         | 800                 | 11         | 10<br>37             | 17<br>48             | [155] |

n.r.: not reported;

**Table S4.** Continued.

| Metal<br>(loading, wt%) | Support                            | Ni loading<br>(wt%) | Preparation method | Reaction conditions                       |                     |          | Conversion (%)  |                 | Ref.  |
|-------------------------|------------------------------------|---------------------|--------------------|-------------------------------------------|---------------------|----------|-----------------|-----------------|-------|
|                         |                                    |                     |                    | CH <sub>4</sub> /CO <sub>2</sub><br>ratio | Temperature<br>(°C) | Time (h) | CH <sub>4</sub> | CO <sub>2</sub> |       |
| -<br>Ru (0.7)           | MgO – CR (a)                       | 9.6<br>9.2          | Solvothermal       | 1                                         | 800                 | 100      | 83<br>87        | 89<br>94        | [156] |
| -<br>Ru (0.7)           | MgO – DR (b)                       | 9.6<br>9.2          | Solvothermal       | 1                                         | 800                 | 100      | 81<br>78        | 89<br>86        | [156] |
| -<br>Ru (0.66)          | Al <sub>2</sub> O <sub>3</sub>     | 8<br>8.2            | Impregnation       | 1                                         | 800                 | 2        | 95<br>100       | 85<br>71        | [157] |
| -<br>Ru (0.75)          | SiO <sub>2</sub>                   | 6<br>6.9            | Impregnation       | 1                                         | 800                 | 2        | 37<br>61        | 50<br>62        | [157] |
| -<br>Ru (0.35)          | MgO-Al <sub>2</sub> O <sub>3</sub> | 17.2<br>15.2        | Impregnation       | 1                                         | 650                 | 2        | 55<br>28        | 66<br>39        | [158] |

n.r.: not reported; (a) CR: calcination with subsequent reduction; (b) DR: direct reduction
